# Supplementary material
Source: PubMed Central journal article supplement (PMC3406712)
Supplement: supp_M111.291898_jbc.M111.291898-1.pdf [file supp_M111.291898_jbc.M111.291898-1.pdf]

## **SUPPLEMENTAL DATA**

**Supplemental video 1:** Real-time video clip of severing of a loosely attached microtubule. The initial length of the microtubule is approximately 30  $\mu\text{m}$ , the Brownian motion is clearly visible.

**Supplemental video 2:** Real-time video clip of severing of more tightly attached microtubules. The sequence shown in movie 2 was used to generate figure 3 and the data used for figure 8A.
